# Supplementary material
Source: PubMed Central journal article supplement (PMC6531348)
Supplement: NIHMS1528089-supplement-262_2019_2342_MOESM1_ESM.pdf [file NIHMS1528089-supplement-262_2019_2342_MOESM1_ESM.pdf]

## Electronic Supplementary Materials:

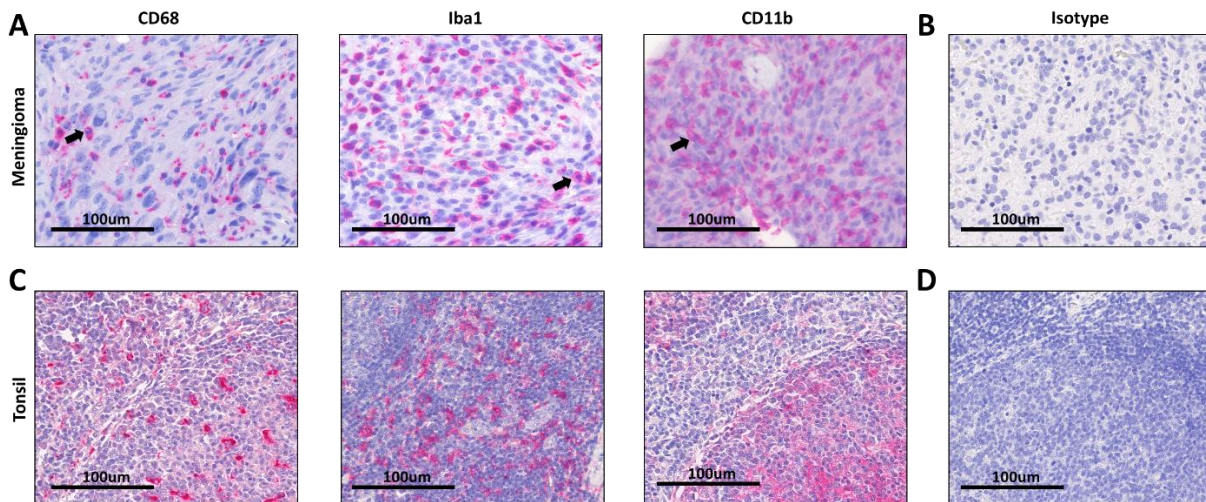

### Supplementary figure 1: Multiple myeloid markers demonstrate cross-reactivity with tumor cells.

(A) Immunohistochemistry staining with CD68 (left), Iba1 (middle), and CD11b (right) demonstrate cross-reactivity between myeloid cell antibodies and tumor cells. (B) Negative staining control using IgG1 isotype on a meningioma section. (C) Positive staining controls with CD68 (left), Iba1 (middle), and CD11b (right) on tonsil sections. (D) Negative staining control using IgG1 isotype on a tonsil section. Slides were reviewed with a neuropathologist (C. Horbinski), who confirmed the occurrence of tumor cells with atypical nuclei (black arrows) staining positive for myeloid markers.
